# Supplementary material for: Reaction mechanism of the ethynylation of formaldehyde on copper terminated Cu2O(100) surfaces: a DFT study
Source: Royal Society of Chemistry journal article supplement (doi:10.1039/d3cp03903j), 2023-11-29
Supplement: d3cp03903j1.pdf [file d3cp03903j1.pdf]

## Supplementary Information

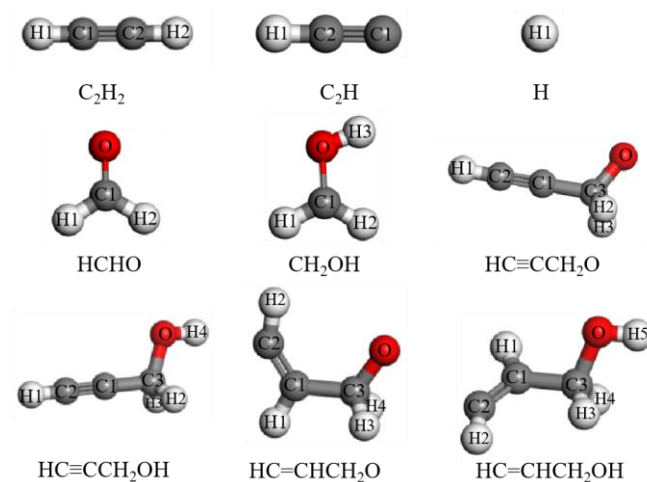

Figure S3. Optimized geometric configuration of the species

Table S1 Bader charge analysis of adsorbate before and after adsorption

| $C_2H_2$ |                      |                     | $C_2H$ |                      |                     | H |                      |                     |
|----------|----------------------|---------------------|--------|----------------------|---------------------|---|----------------------|---------------------|
| e        | Before<br>adsorption | After<br>adsorption | e      | Before<br>adsorption | After<br>adsorption | e | Before<br>adsorption | After<br>adsorption |
| H1       | 0.20                 | 0.09                | H1     | 0.28                 | 0.30                | H | 0                    | -0.28               |
| H2       | 0.14                 | 0.09                | C1     | 0.44                 | -0.01               |   |                      |                     |
| C1       | -0.09                | -0.30               | C2     | -0.72                | -0.74               |   |                      |                     |
| C2       | -0.25                | -0.29               |        |                      |                     |   |                      |                     |

Table S2 Bader charge analysis of adsorbate before and after adsorption

| $C_2H_2$ |                      |                     | $C_2H$ |                      |                     | H |                      |                     |
|----------|----------------------|---------------------|--------|----------------------|---------------------|---|----------------------|---------------------|
| e        | Before<br>adsorption | After<br>adsorption | e      | Before<br>adsorption | After<br>adsorption | e | Before<br>adsorption | After<br>adsorption |
| H1       | 0.20                 | 0.09                | H1     | 0.28                 | 0.30                | H | 0                    | -0.28               |
| H2       | 0.14                 | 0.09                | C1     | 0.44                 | -0.01               |   |                      |                     |
| C1       | -0.09                | -0.30               | C2     | -0.72                | -0.74               |   |                      |                     |
| C2       | -0.25                | -0.29               |        |                      |                     |   |                      |                     |

Table S3 Bader charge analysis of adsorbate before and after adsorption

| HC≡CCH <sub>2</sub> O |            |            | HC≡CCH <sub>2</sub> OH |            |            | HC=CHCH <sub>2</sub> O |            |            | HC=CHCH <sub>2</sub> OH |            |            |
|-----------------------|------------|------------|------------------------|------------|------------|------------------------|------------|------------|-------------------------|------------|------------|
| e                     | Before     | After      | e                      | Before     | After      | e                      | Before     | After      | e                       | Before     | After      |
|                       | adsorption | adsorption |                        | adsorption | adsorption |                        | adsorption | adsorption |                         | adsorption | adsorption |
| H1                    | 0.18       | 0.23       | H1                     | 0.24       | 0.09       | H1                     | 0.14       | 0.06       | H1                      | 0.10       | 0.05       |
| H2                    | 0.16       | 0.12       | H2                     | 0.04       | 0.12       | H2                     | 0.20       | 0.07       | H2                      | 0.15       | 0.06       |
| H3                    | 0.13       | 0.16       | H3                     | 0.13       | 0.08       | H3                     | 0.12       | 0.07       | H3                      | 0.06       | 0.09       |
| C1                    | -0.38      | -0.58      | H4                     | 0.66       | 0.65       | H4                     | 0.12       | 0.04       | H4                      | 0.05       | 0.06       |
| C2                    | 0.10       | 0.07       | C1                     | -0.49      | -0.23      | C1                     | 0.10       | -0.28      | H5                      | 0.58       | 0.92       |
| C3                    | 0.51       | 0.42       | C2                     | 0.10       | -0.33      | C2                     | -0.28      | -0.23      | C1                      | 0.04       | -0.16      |
| O                     | -0.69      | -1.01      | C3                     | 0.46       | 0.32       | C3                     | 0.44       | 0.41       | C2                      | -0.29      | -0.27      |
|                       |            |            | O                      | -1.14      | -1.25      | O                      | -0.86      | -1.03      | C3                      | 0.40       | 0.33       |
|                       |            |            |                        |            |            |                        |            |            | O                       | -1.08      | -1.31      |

Table S4 Structural parameters of IS, TS and FS of acetylenyl by acetylene dehydrogenation

| Geometric parameters (Å) | IS   | TS   | FS   |
|--------------------------|------|------|------|
| d(C1-C2)                 | 1.37 | 1.30 | 1.28 |
| d(C1-H1)                 | 1.10 | 1.40 | 3.22 |
| d(C1-Cu1)                | 1.94 | 1.93 | 1.94 |
| d(H1-Cu1)                | 2.68 | 1.58 | 1.61 |

Table S5 Structural parameters of IS, TS, and FS of acetylenyl addition with HCHO

| Geometric parameters (Å) | IS   | TS   | FS   |
|--------------------------|------|------|------|
| d(C1-C2)                 | 1.28 | 1.29 | 1.28 |
| d(C3-O1)                 | 1.32 | 1.35 | 1.44 |
| d(C1-C3)                 | 2.93 | 1.98 | 1.47 |
| d(C1-Cu1)                | 1.87 | 1.89 | 2.62 |
| d(C3-Cu1)                | 1.93 | 2.17 | 1.88 |

Table S6 Structural parameters of IS, TS, and FS of HC≡CCH<sub>2</sub>O\* hydrogenation

| Geometric parameters (Å) | IS   | TS   | FS   |
|--------------------------|------|------|------|
| d(C1-C2)                 | 1.28 | 1.38 | 1.39 |
| d(C1-C3)                 | 1.47 | 1.52 | 1.51 |
| d(O1-H4)                 | 4.19 | 1.54 | 0.98 |
| d(O1-Cu)                 | 1.88 | 2.01 | 2.10 |
| d(H4-Cu)                 | 1.51 | 1.55 | 3.45 |

Table S7 Structural parameters of IS, TS, and FS of acetylene and HCHO addition

| Geometric parameters (Å) | IS   | TS   | FS   |
|--------------------------|------|------|------|
| d(C1-C2)                 | 1.37 | 1.36 | 1.39 |
| d(C1-H1)                 | 1.11 | 1.10 | 1.10 |
| d(C3-O1)                 | 1.34 | 1.38 | 1.45 |
| d(C1-C3)                 | 2.67 | 1.95 | 1.52 |
| d(C1-Cu1)                | 1.92 | 1.96 | 2.66 |
| d(C3-Cu1)                | 1.90 | 2.04 | 2.77 |

Table S8 Structural parameters of IS, TS, and FS of hydrogen transfer reaction

| Geometric parameters (Å) | IS   | TS   | FS   |
|--------------------------|------|------|------|
| d(C1-H1)                 | 1.10 | 1.79 | 2.40 |
| d(O1-H1)                 | 2.60 | 1.98 | 0.99 |
| d(H1-Cu1)                | 3.47 | 1.51 | 2.47 |

Table S9 Structural parameters of IS, TS, and FS of formaldehyde hydrogenation

| Geometric parameters (Å) | IS   | TS   | FS   |
|--------------------------|------|------|------|
| d(C1-O1)                 | 1.32 | 1.41 | 1.45 |
| d(O1-H3)                 | 4.10 | 1.40 | 0.97 |

Table S10 Structural parameters of IS, TS, and FS of acetylenyl and CH<sub>2</sub>OH\* addition

| Geometric parameters (Å) | IS   | TS   | FS   |
|--------------------------|------|------|------|
| d(C1-C2)                 | 1.28 | 1.30 | 1.39 |
| d(C1-C3)                 | 3.58 | 2.53 | 1.46 |
| d(C1-Cu1)                | 1.95 | 1.80 | 1.93 |
| d(C3-Cu1)                | 2.14 | 2.97 | 2.96 |
| d(O1-Cu4)                | 2.66 | 2.02 | 2.18 |

Table S11 Structural parameters of IS, TS, and FS of acetylene and CH<sub>2</sub>OH\* addition

| Geometric parameters (Å) | IS   | TS   | FS   |
|--------------------------|------|------|------|
| d(C1-C2)                 | 1.35 | 1.36 | 1.39 |
| d(C1-H1)                 | 1.16 | 1.10 | 1.10 |
| d(C3-O1)                 | 1.50 | 1.46 | 1.49 |
| d(C1-C3)                 | 3.14 | 2.20 | 1.50 |
| d(C1-Cu1)                | 2.03 | 1.96 | 2.90 |
| d(C3-Cu1)                | 2.17 | 2.00 | 3.07 |
| d(O-Cu4)                 | 2.68 | 2.04 | 2.10 |

Table S12 Structural parameters of IS, TS, and FS of HCCHCH<sub>2</sub>OH\* dehydrogenation

| Geometric parameters (Å) | IS   | TS   | FS   |
|--------------------------|------|------|------|
| d(C1-C2)                 | 1.39 | 1.38 | 1.38 |
| d(C1-H1)                 | 1.10 | 1.93 | 4.60 |
| d(C1-C3)                 | 1.50 | 1.51 | 1.50 |
| d(C1-Cu1)                | 2.90 | 1.87 | 1.93 |
| d(H1-Cu1)                | 2.33 | 1.49 | 4.61 |

Table S13 Bader charge analysis of co-adsorption configuration of coupling reaction

| e   | C <sub>2</sub> H+HCHO | C <sub>2</sub> H <sub>2</sub> +HCHO | C <sub>2</sub> H+CH <sub>2</sub> OH | C <sub>2</sub> H <sub>2</sub> +CH <sub>2</sub> OH |
|-----|-----------------------|-------------------------------------|-------------------------------------|---------------------------------------------------|
| H1  | 0.25                  | 0.07                                | 0.23                                | 0.10                                              |
| H2  |                       | 0.07                                |                                     | 0.07                                              |
| C1  | -0.17                 | -0.26                               | -0.21                               | -0.26                                             |
| C2  | -0.51                 | -0.40                               | -0.48                               | -0.38                                             |
| H3  | 0.20                  | 0.07                                | 0.09                                | 0.13                                              |
| H4  | 0.20                  | 0.10                                | 0.08                                | 0.13                                              |
| H5  |                       |                                     | 0.68                                | 0.66                                              |
| C3  | 0.39                  | 0.49                                | 0.03                                | -0.01                                             |
| O1  | -1.02                 | -1.05                               | -1.18                               | -1.14                                             |
| Cu1 | 0.72                  | 0.59                                | 0.47                                | 0.49                                              |
| Cu2 | 0.48                  | 0.47                                | 0.49                                | 0.50                                              |
| Cu3 | 0.49                  | 0.38                                | 0.48                                | 0.39                                              |
| Cu4 | 0.52                  | 0.54                                | 0.36                                | 0.38                                              |

Table S14 Bader charge analysis of adsorbate before and after adsorption

|    |            | HOCH <sub>2</sub> C≡C |    | HOCH <sub>2</sub> C≡CCH <sub>2</sub> O |            | HOCH <sub>2</sub> C≡CCH <sub>2</sub> OH |            |            |
|----|------------|-----------------------|----|----------------------------------------|------------|-----------------------------------------|------------|------------|
| e  | Before     | After                 | e  | Before                                 | After      | e                                       | Before     | After      |
|    | adsorption | adsorption            |    | adsorption                             | adsorption |                                         | adsorption | adsorption |
| C1 | 0.39       | -0.06                 | H1 | 0.16                                   | 0.03       | H1                                      | 0.03       | 0.09       |
| C2 | -0.61      | -0.56                 | H2 | 0.13                                   | 0.03       | H2                                      | 0.09       | 0.09       |
|    |            |                       | C1 | 0.29                                   | -0.35      | H3                                      | 0.69       | 0.81       |
|    |            |                       | C2 | -0.64                                  | -0.12      | C1                                      | 0.13       | -0.26      |
|    |            |                       | C3 | 0.52                                   | 0.43       | C2                                      | -0.43      | -0.23      |
|    |            |                       | O1 | -1.08                                  | -0.99      | C3                                      | 0.47       | 0.31       |
|    |            |                       |    |                                        |            | O1                                      | -1.17      | -1.28      |

Table S15 Bader charge analysis of HOCH<sub>2</sub>C=CHCH<sub>2</sub>O\* and HOCH<sub>2</sub>C=CHCH<sub>2</sub>OH\* before and after adsorption

| HOCH <sub>2</sub> C=CHCH <sub>2</sub> O |                   |                  | HOCH <sub>2</sub> C=CHCH <sub>2</sub> OH |                   |                  |
|-----------------------------------------|-------------------|------------------|------------------------------------------|-------------------|------------------|
| e                                       | Before adsorption | After adsorption | e                                        | Before adsorption | After adsorption |
| H1                                      | 0.10              | 0.06             | H1                                       | 0.12              | 0.09             |
| H2                                      | 0.07              | 0.05             | H2                                       | 0.04              | 0.10             |
| H3                                      | 0.07              | 0.08             | H3                                       | 0.07              | 0.12             |
| C1                                      | -0.02             | -0.28            | H4                                       | 0.62              | 0.77             |
| C2                                      | -0.12             | -0.17            | C1                                       | 0.02              | -0.25            |
| C3                                      | 0.45              | 0.41             | C2                                       | -0.31             | -0.16            |
| O1                                      | -0.70             | -1.02            | C3                                       | 0.44              | 0.29             |
|                                         |                   |                  | O1                                       | -1.12             | -1.17            |

Table S16 Structural parameters of IS, TS, and FS of propargyl alcohol dehydrogenation

| Geometric parameters (Å) | IS   | TS   | FS   |
|--------------------------|------|------|------|
| d(C1-C2)                 | 1.38 | 1.30 | 1.29 |
| d(C1-H1)                 | 1.11 | 1.85 | 3.30 |
| d(H1-Cu1)                | 2.63 | 1.55 | 1.61 |

Table S17 Structural parameters of IS, TS, and FS of HOCH<sub>2</sub>CC\* and HCHO addition

| Geometric parameters (Å) | IS   | TS   | FS   |
|--------------------------|------|------|------|
| d(C1-C2)                 | 1.28 | 1.30 | 1.35 |
| d(C1-C3)                 | 2.89 | 1.94 | 1.49 |
| d(C3-O1)                 | 1.32 | 1.34 | 1.46 |
| d(C1-Cu1)                | 1.87 | 1.90 | 2.06 |

Table S18 Structural parameters of IS, TS, and FS of HOCH<sub>2</sub>C≡CCH<sub>2</sub>O\* hydrogenation

| Geometric parameters (Å) | IS   | TS   | FS   |
|--------------------------|------|------|------|
| d(C1-C2)                 | 1.35 | 1.39 | 1.39 |
| d(C1-C3)                 | 1.49 | 1.51 | 1.49 |
| d(C3-O1)                 | 1.47 | 1.44 | 1.46 |
| d(O1-H3)                 | 4.28 | 1.43 | 0.98 |
| d(O1-Cu4)                | 1.86 | 2.02 | 2.08 |
| d(H-Cu5)                 | 1.56 | 1.64 | 3.57 |

Table S19 Structural parameters of IS, TS, and FS of propargyl alcohol addition with HCHO

| Geometric parameters (Å) | IS   | TS   | FS   |
|--------------------------|------|------|------|
| d(C1-C2)                 | 1.37 | 1.36 | 1.39 |
| d(C1-C3)                 | 2.67 | 2.24 | 1.51 |
| d(C3-O1)                 | 1.34 | 1.33 | 1.44 |
| d(C1-Cu1)                | 1.91 | 2.00 | 2.62 |
| d(C3-Cu1)                | 1.90 | 2.77 | 2.78 |
| d(O1-Cu4)                | 1.90 | 1.90 | 1.87 |

Table S20 Structural parameters of IS, TS, and FS of hydrogen transfer reaction

| Geometric parameters (Å) | IS   | TS   | FS   |
|--------------------------|------|------|------|
| d(C1-C2)                 | 1.39 | 1.38 | 1.38 |
| d(C1-H1)                 | 1.10 | 1.45 | 2.76 |
| d(O1-H1)                 | 2.54 | 1.54 | 0.98 |
| d(C1-Cu1)                | 2.62 | 1.94 | 1.92 |
| d(H1-Cu1)                | 2.14 | 1.56 | 2.98 |

Table S21 Structural parameters of IS, TS, and FS of HOCH<sub>2</sub>C≡C\* and CH<sub>2</sub>OH\* addition

| Geometric parameters (Å) | IS   | TS   | FS   |
|--------------------------|------|------|------|
| d(C1-C2)                 | 1.29 | 1.30 | 1.38 |
| d(C1-C3)                 | 3.58 | 2.55 | 1.50 |
| d(C1-Cu1)                | 1.96 | 1.81 | 1.92 |
| d(C3-Cu1)                | 2.14 | 3.01 | 2.95 |

Table S22 Structural parameters of IS, TS, and FS of propargyl alcohol addition with CH<sub>2</sub>OH\*

| Geometric parameters (Å) | IS   | TS   | FS   |
|--------------------------|------|------|------|
| d(C1-C3)                 | 3.28 | 2.20 | 1.50 |
| d(C3-O1)                 | 1.47 | 1.46 | 1.49 |
| d(C1-Cu1)                | 2.01 | 1.97 | 2.77 |
| d(C3-Cu1)                | 2.20 | 2.00 | 3.00 |

Table S23 Structural parameters of IS, TS, and FS of HOCH<sub>2</sub>C=CHCH<sub>2</sub>OH\* dehydrogenation

| Geometric parameters (Å) | IS   | TS   | FS   |
|--------------------------|------|------|------|
| d(C1-C2)                 | 1.39 | 1.38 | 1.38 |
| d(C1-H1)                 | 1.10 | 1.86 | 4.61 |
| d(C1-C3)                 | 1.50 | 1.50 | 1.50 |
| d(H1-Cu1)                | 2.29 | 1.51 | 4.54 |
| d(H1-Cu5)                | 2.82 | 2.13 | 1.56 |
| d(C1-Cu1)                | 2.77 | 1.88 | 1.92 |
| d(O1-Cu4)                | 2.10 | 2.02 | 2.13 |
